# Supplementary material for: Characterizing normal perinatal development of the human brain structural connectivity
Source: PubMed Central journal article supplement — Hum Brain Mapp. 2024 Jul 19;45(11):e26784. doi: 10.1002/hbm.26784 (PMC11259574; doi:10.1002/hbm.26784), 2024-07-19
Supplement: HBM-45-e26784-s001.pdf [file HBM-45-e26784-s001.pdf]

**TABLE 1** Anatomical cortical regions of interest (ROIs) used as nodes from the ENA50 atlas and the abbreviations used in this paper.

| Anatomical ROI                      | Abbreviation | Anatomical ROI               | Abbreviation |
|-------------------------------------|--------------|------------------------------|--------------|
| Precentral                          | Precent      | Middle Occipital             | MidOccp      |
| Superior Frontal                    | SupFrnt      | Inferior Occipital           | InfOccp      |
| Orbital part of Superior Frontal    | OrbSFrnt     | Fusiform                     | Fusiform     |
| Middle Frontal                      | MidFrnt      | Postcentral                  | Pstcent      |
| Orbital part of Middle Frontal      | OrbMidFrn    | Superior Parietal Lobule     | SPL          |
| Opercular part of Inferior Frontal  | OpIF         | Inferior Parietal Lobule     | InfParLob    |
| Triangular part of Inferior Frontal | TriIFG       | Supramarginal                | SuprMarg     |
| Orbital part of Inferior Frontal    | OrbIF        | Angular                      | Angl         |
| Rolandic Operculum                  | RoOper       | Precuneus                    | Precuneus    |
| Supplementary Motor Area            | SMA          | Paracentral Lobule           | PCL          |
| Olfactory                           | Olfac        | Caudate                      | Caudt        |
| Medial part of Superior Frontal     | MedSupFro    | Putamen                      | Putm         |
| Orbital part of Medial Frontal      | OrbMFrnt     | Pallidum                     | Pldm         |
| Straight                            | Rectus       | Thalamus                     | Thal         |
| Insula                              | Ins          | Transverse Temporal          | TransvTmp    |
| Anterior Cingulate                  | AntCng       | Superior Temporal            | SupTmp       |
| Middle Cingulate                    | MidCng       | Superior Temporal Pole       | SupTmpPol    |
| Posterior Cingulate                 | PostCng      | Middle Temporal              | MidTmp       |
| Hippocampus                         | Hipp         | Middle Temporal Pole         | MidTmpPol    |
| ParaHippocampal                     | ParaHipp     | Inferior Temporal            | InfTmp       |
| Amygdala                            | Amgdl        | Cerebellum                   | Cblum        |
| Calcarine                           | Calc         | Anterior part of the Vermis  | AntVrm       |
| Cuneus                              | Cuneus       | Posterior part of the Vermis | PosVrm       |
| Lingual                             | Ling         | Median part of the Vermis    | CntVrm       |
| Superior Occipital                  | SupOccp      |                              |              |

**TABLE 2** Brain lobes defined by merging the relevant nodes in the ENA50 atlas and the abbreviated names used to refer to these lobes in this paper.

| Anatomical ROI | Abbreviation |
|----------------|--------------|
| Frontal        | Fr           |
| Medial         | Md           |
| Basal Ganglia  | BG           |
| Cerebellum     | Cb           |
| Insula         | In           |
| Parietal       | Pt           |
| Temporal       | Tp           |
| Occipital      | Oc           |

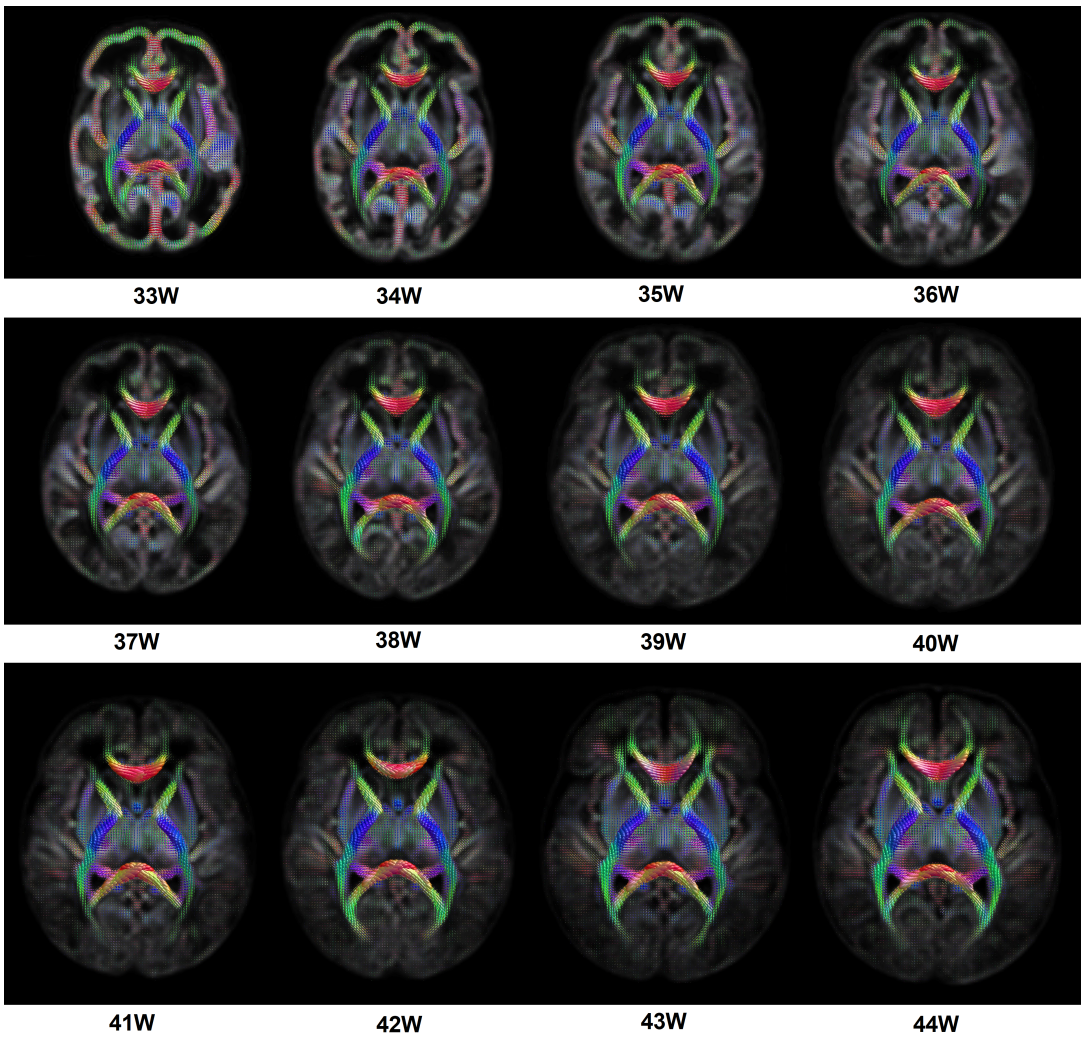

**FIGURE 1** An axial slice from the FOD atlases for each of the postmenstrual ages between 33 and 44 weeks considered in this study.

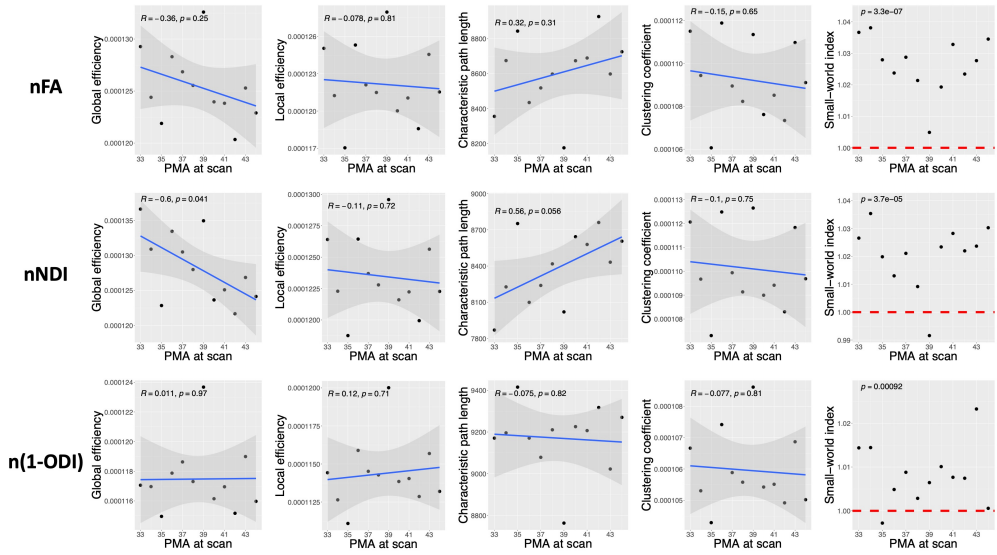

**FIGURE 2** Plots of different structural connectivity measures, computed with the parcellation nodes defined with the ENA50 atlas, versus PMA for the connectome edge weighting based on FA, NDI, and 1-ODI. In these plots, the connectomes for each weighting scheme have been normalized such that the total connectome strength is the same for all PMAs.



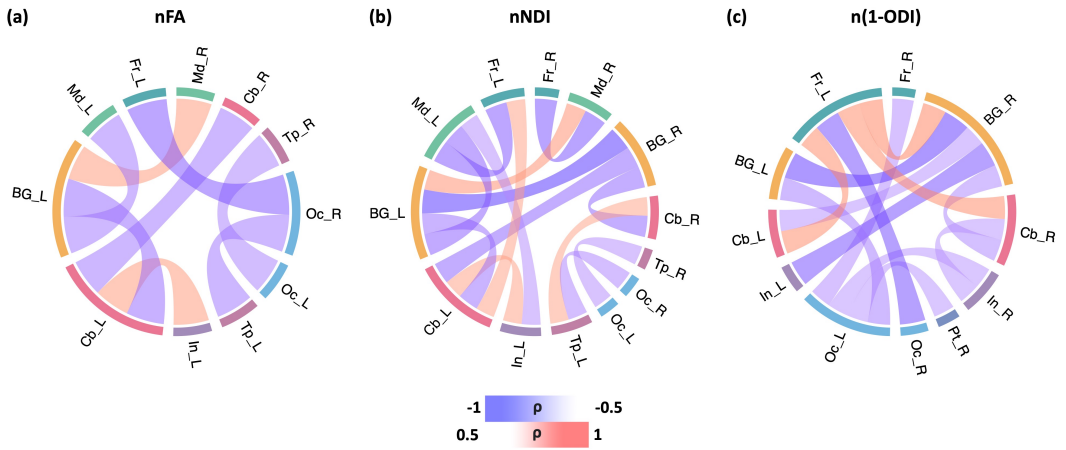

**FIGURE 5** Lobe-wise connections that are significantly correlated with PMA in the connectomes that have been normalized in terms of the total network strength. These connectomes show the Spearman's rank correlation coefficient ( $\rho$ ) after FDR correction. The color intensity of the edges is proportional to  $\rho$ .

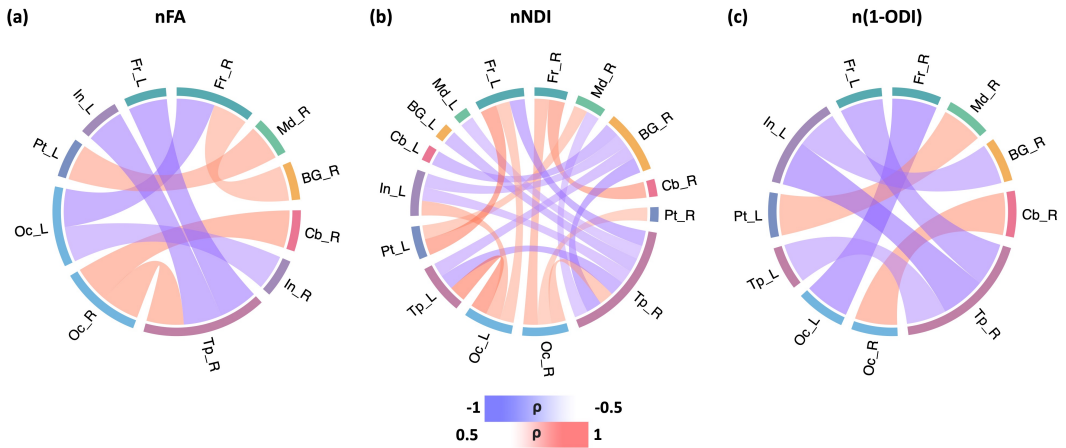

**FIGURE 6** Lobe-wise connections that are significantly correlated with PMA for the length-preserved connectome averaging method. In these plots, the connectomes are normalized in terms of the total network strength. They show the Spearman's rank correlation coefficient ( $\rho$ ) after FDR correction. The color intensity of the edges are proportional to  $\rho$ .

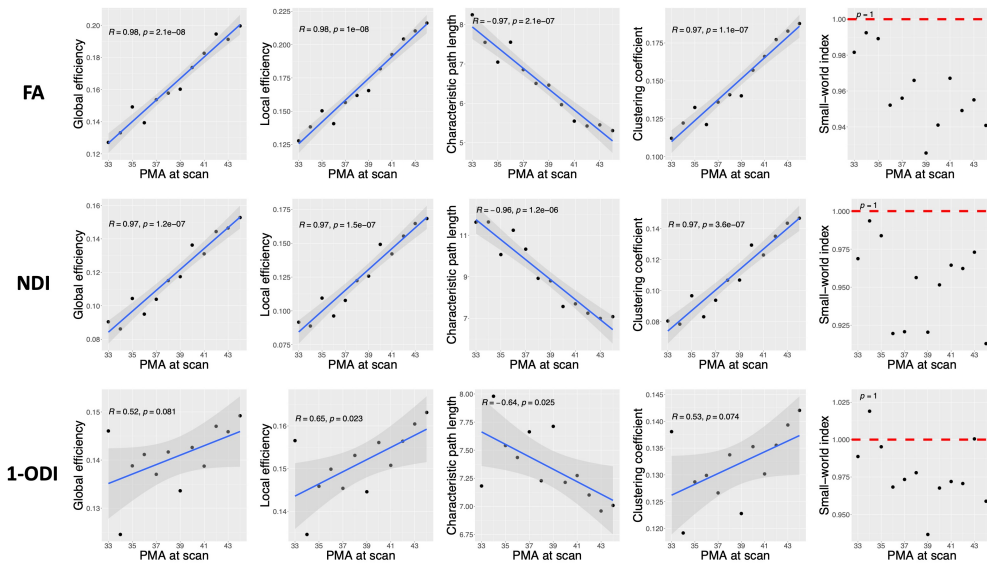

**FIGURE 7** Plots of different structural connectivity measures, computed with the parcellation nodes defined with the UNC FC atlas, versus PMA for the connectome edge weighting based on FA, NDI, and 1-ODI.

**TABLE 3** Summary of the PMA regression results. *ENA50* column shows the results of our proposed method with the parcellation nodes defined with the ENA50 atlas. *ENA50 - normalization* column presents the same, but with normalizing the connectomes across PMA to have the same total strength. *UNC FC* column shows the results of our method with the parcellation nodes defined by the UNC FC atlas. Lastly, *Connectome averaging* column presents the results of connectome-level averaging based on the length-preserved method.

|              |     | ENA50          |         | ENA50 - normalization |         | UNC FC         |         | Connectome averaging |         |
|--------------|-----|----------------|---------|-----------------------|---------|----------------|---------|----------------------|---------|
|              |     | <i>p-value</i> | R       | <i>p-value</i>        | R       | <i>p-value</i> | R       | <i>p-value</i>       | R       |
|              | GE  | <0.0001        | 0.9854  | 0.2509                | -0.3596 | <0.0001        | 0.9805  | <0.0001              | 0.9777  |
|              | LE  | <0.0001        | 0.9858  | 0.8090                | -0.0782 | <0.0001        | 0.9832  | <0.0001              | 0.9699  |
| <b>FA</b>    | CPL | <0.0001        | -0.9728 | 0.3099                | 0.3204  | <0.0001        | -0.9691 | <0.0001              | -0.9603 |
|              | CC  | <0.0001        | 0.9772  | 0.6522                | -0.1453 | <0.0001        | 0.9729  | <0.0001              | 0.9753  |
|              | SWI | <0.0001        | /       | <0.0001               | /       | 1.0000         | /       | <0.0001              | /       |
|              | GE  | <0.0001        | 0.9813  | 0.0407                | -0.5964 | <0.0001        | 0.9725  | <0.0001              | 0.9829  |
|              | LE  | <0.0001        | 0.9794  | 0.7249                | -0.1137 | <0.0001        | 0.9713  | <0.0001              | 0.9770  |
| <b>NDI</b>   | CPL | <0.0001        | -0.9730 | 0.0560                | 0.5642  | <0.0001        | -0.9563 | <0.0001              | -0.9700 |
|              | CC  | <0.0001        | 0.9750  | 0.7465                | -0.1045 | <0.0001        | 0.9656  | <0.0001              | 0.9798  |
|              | SWI | <0.0001        | /       | <0.0001               | /       | 1.0000         | /       | 0.0074               | /       |
|              | GE  | 0.0111         | 0.7008  | 0.9719                | 0.0114  | 0.0809         | 0.5232  | 0.4092               | 0.2628  |
|              | LE  | 0.0144         | 0.6826  | 0.7136                | 0.1186  | 0.0233         | 0.6458  | 0.6256               | 0.1572  |
| <b>1-ODI</b> | CPL | 0.0140         | -0.6850 | 0.8164                | -0.0752 | 0.0247         | -0.6409 | 0.3283               | -0.3091 |
|              | CC  | 0.0353         | 0.6098  | 0.8113                | -0.0773 | 0.0740         | 0.5335  | 0.8440               | 0.0638  |
|              | SWI | 0.0020         | /       | 0.0009                | /       | 0.9982         | /       | <0.0001              | /       |
